# Supplementary material
Source: PubMed Central journal article supplement (PMC8670556)
Supplement: NIHMS556330-supplement-supplement_1.pdf [file NIHMS556330-supplement-supplement_1.pdf]

### **Supplemental Methods:**

D54MG cells were cultured at 37°C and 5% carbon dioxide atmosphere in Dulbecco modified Eagle medium:F12 medium with 7% fetal bovine serum. To establish D54MG tumors in athymic nude mice, D54 cells were trypsinized and injected subcutaneously at  $4.5 \times 10^6$  cells in 200ul serum free DMEM into the right flanks of 6-8 week old mice. 3 weeks post implantation, tumors were measured using vernier calipers and mice were randomized and inoculated with  $2.25 \times 10^7$  oncolytic HSV-1 virus or saline intratumorally. Mice were irradiated 24 hours post implantation using a Co-60 source irradiator.  $^{60}\text{Co}$  was administered in a  $28 \times 28$ -cm collimated beam to 5 animals arranged on a 5-cm backscatter board, with the bodies shielded with 8-cm-thick Cerrobend lead shielding. The tumors were irradiated with one fraction of 5 Gy.

### **Supplemental Figure Legend:**

**Supplemental Figure 1:** Fractional tumor volumes of D54 glioma xenografts. D54 glioma xenografts were treated with oncolytic HSV-1 alone, a single fraction of 5 Gy IR, or oncolytic HSV-1 followed by 5 Gy 24 hrs post infection. Tumors volume measurements were normalized to tumor volumes on day 0, FTV ( $V/V_0$ ).

## Supplemental Figure 1

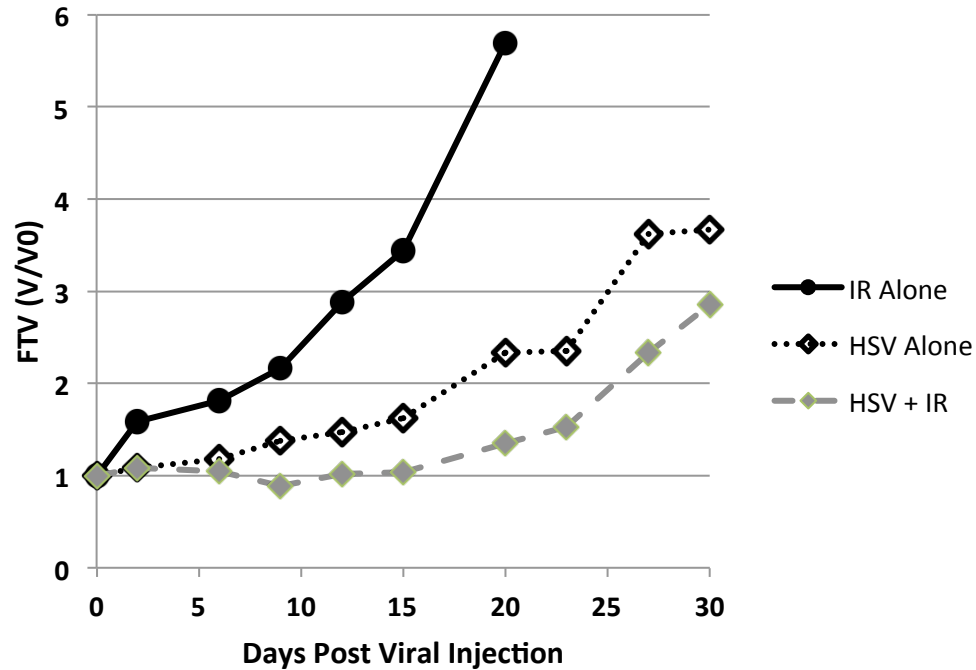

**Supplemental Figure 1:** Fractional tumor volumes of D54 glioma xenografts. D54 glioma xenografts were treated with oncolytic HSV-1 alone, a single fraction of 5 Gy IR, or oncolytic HSV-1 followed by 5 Gy 24 hrs post infection. Tumor volume measurements were normalized to tumor volumes on day 0, FTV ( $V/V_0$ ).
